# Supplementary material for: Immunosuppressant-Responsive Enteropathy and Non-Responsive Enteropathy in Dogs: Prognostic Factors, Short- and Long-Term Follow Up
Source: MDPI journal article supplement (doi:10.3390/ani11092637), 2021-09-08
Supplement: s1 [file s1]

**Table S1.** Scheme on how to calculate Canine Chronic Enteropathy activity index (CCECAI) [7].

|                              |                                                                                                                                                                        |
|------------------------------|------------------------------------------------------------------------------------------------------------------------------------------------------------------------|
| Attitude/activity            | 0 normal<br>1 slightly decreased<br>2 moderately decreased<br>3 severely decreased                                                                                     |
| Appetite                     | 0 normal<br>1 slightly decreased<br>2 moderately decreased<br>3 severely decreased                                                                                     |
| Vomiting                     | 0 normal<br>1 mild (< 1 event/week)<br>2 moderate (<2–3 event/week)<br>3 severe (> 3 events/week)                                                                      |
| Fecal consistency            | 0 normal<br>1 slightly soft feces<br>2 very soft feces<br>3 watery diarrhea                                                                                            |
| Fecal frequency              | 0 normal<br>1 slightly increased (< 2 events/day) or fecal blood, mucus, or both<br>2 moderately increased (< 4–5 events/day)<br>3 severely increased (> 5 events/day) |
| Weight loss                  | 0 none<br>1 mild (<5%)<br>2 moderate (5–10%)<br>3 severe (>10%)                                                                                                        |
| Albumin levels               | 0 albumin >20g/L<br>1 albumin 15–19.9 g/L<br>2 albumin 12–14.9 g/L<br>3 albumin <12 g/L                                                                                |
| Ascites and peripheral edema | 0 none<br>1 mild ascites or peripheral edema<br>2 moderate amounts of ascites/ peripheral edema<br>3 severe ascites/pleural effusion and peripheral edema              |
| Pruritus                     | 0 no pruritus<br>1 occasional episodes of itching<br>2 regular episodes of itching, but stops when dog is asleep<br>3 pruritis regularly wakes dog                     |
